# Supplementary material
Source: publisher figshare collection journal article supplement (https://acs.figshare.com/ndownloader/files/3958306)
Supplement: Supplementary file 1 [file 3958306]

# Supplementary Information

## Experimental and Theoretical Investigation of the Distance Dependence of Localised Surface Plasmon Coupled Förster Resonance Energy Transfer

*Xia Zhang(1), Cristian A. Marocico(1), Manuela Lunz(1)†, Valerie A. Gerard (2), Yurii K.  
Gun'ko (2), Vladimir Lesnyak (3), Nikolai Gaponik (4), Andrei S. Sussha (5), Andrey L. Rogach  
(5), and A. Louise Bradley (1)\**

(1) School of Physics and CRANN, Trinity College, Dublin 2, Ireland

(2) School of Chemistry and CRANN, Trinity College, Dublin 2, Ireland

(3) Istituto Italiano di Tecnologia, Via Morego 30, 16163 Genova, Italy

(4) Physical Chemistry, TU Dresden, Bergstrasse 66b, 01062 Dresden, Germany

(5) Department of Physics and Materials Science & Center for Functional Photonics (CFP), City  
University of Hong Kong, Hong Kong, China

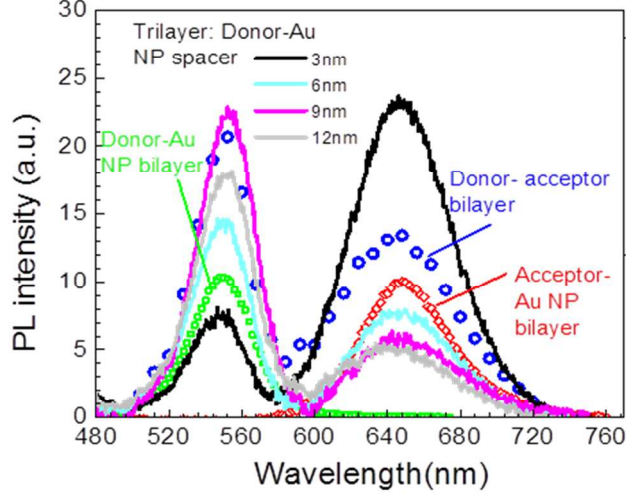

Figure S1: PL spectra of the donor-acceptor bilayer with a  $t_{Don-Acc} = 21$  nm (blue open circle), donor-Au NP bilayer with a  $t_{Don-Au} = 3$  nm (green open square) and the Au NP on acceptor bilayer with  $t_{Acc-Au} = 12$  nm (red open diamond) which is subsequently capped with a PE spacer layer,  $t_{Don-Au} = 3$  nm, and the donor QD monolayer to form the completed trilayer structure (black line). Spectra with varying donor-Au NP spacer are shown with a fixed acceptor-Au NP spacer layer thickness,  $t_{Acc-Au} = 12$  nm. All samples have  $c_{Don} = (2.8 \pm 0.2) \times 10^{17} m^{-2}$  and  $c_{Acc} = (0.48 \pm 0.08) \times 10^{17} m^{-2}$ , respectively. The Au NP concentration is  $c_{Au} = (0.13 \pm 0.03) \times 10^{17} m^{-2}$ .

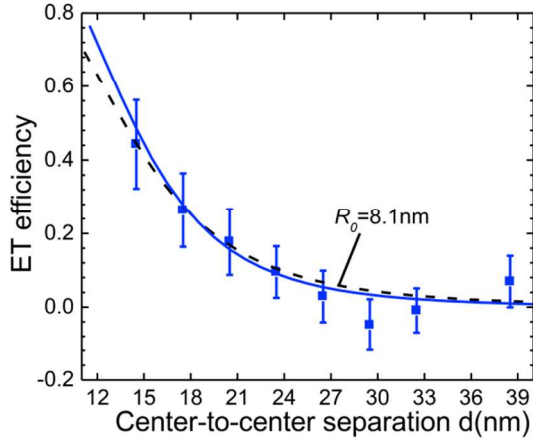

Figure S2: The LSP coupled energy transfer efficiency as a function of the center-to-center distance,  $d$ . The data was measured with a fixed donor-Au NP spacer thickness,  $t_{Acc-Au} = 3$  nm, as presented in Figure 3 in the manuscript. The fit with the equation  $E_{FRET} = \left[ 1 + \frac{2d^4}{c_{Acc}\pi R_0^6} \right]^{-1}$  agrees with the experimental data and the simulation within the error range on the power of  $d$ ,  $d^{-(4.0 \pm 0.4)}$ , and the Förster radius,  $R_0 = (8.1 \pm 0.7)$  nm.
